# Supplementary material for: Mapping niche-specific two-component system requirements in uropathogenic Escherichia coli
Source: PubMed Central journal article supplement (PMC10986536; doi:10.1128/spectrum.02236-23), 2024-02-22

**Supplementary Figure S1:** Representative images of IBCs of (A and B) UT189, (C and D)  $\Delta rssB$ , and (E and F)  $\Delta arcAB$  transformed with pCOM-GFP with images taken with a 5X (A, C, E) and 20X objective (B, D, F).

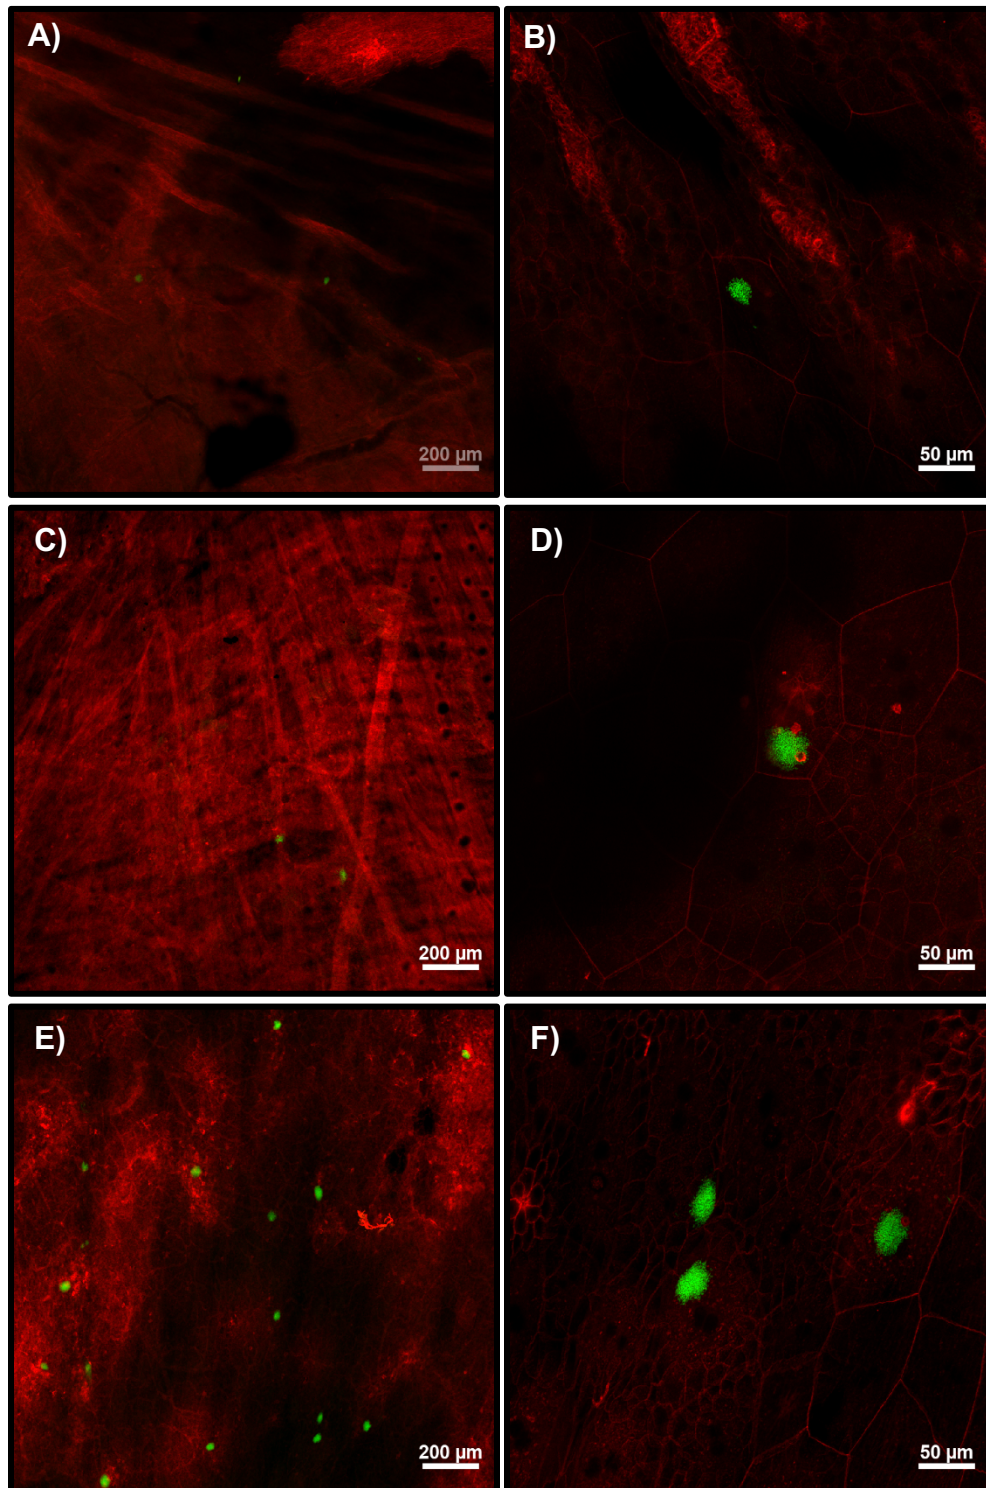

**Supplementary Figure S2:** Urine bacterial titers during the course of long-term 28-day UTI model for A) UTI89, B)  $\Delta arcA\Delta arcB$ , C)  $\Delta narXL$ , D)  $\Delta phoPQ$ , and E)  $\Delta rssB$ . Solid lines connect the urine bacterial titers for each individual mouse. Horizontal dashed lines represent  $10^4$  CFU/mL, the lower limit of persistent bacteriuria.

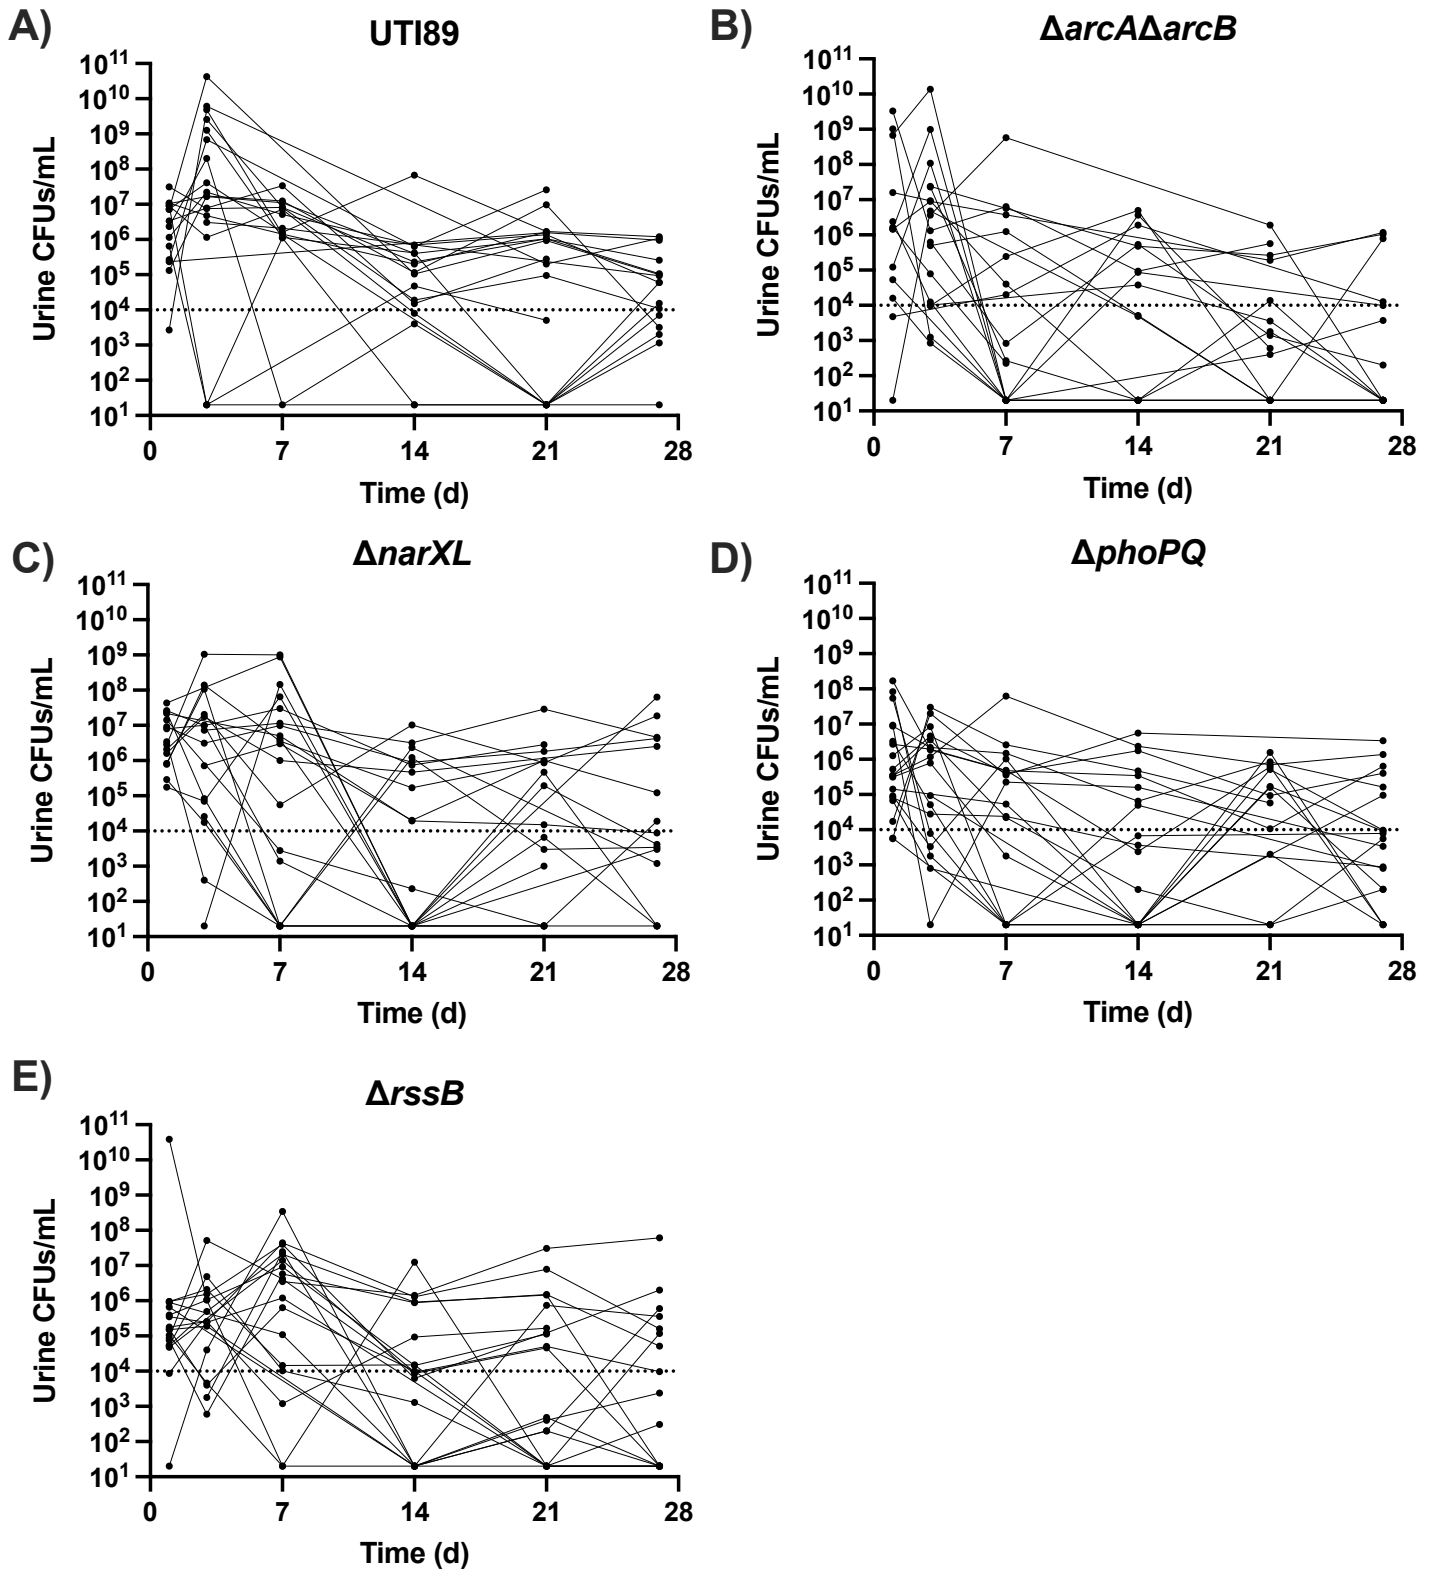

Supplement: spectrum.02236-23-s0003.pdf [file spectrum.02236-23-s0003.pdf]
